# Supplementary material
Source: PubMed Central journal article supplement (PMC4577300)
Supplement: NIHMS684687-supplement-Supplementary_Figure_1.pdf [file NIHMS684687-supplement-Supplementary_Figure_1.pdf]

## Supplementary Figures:

### cGMP dependent protein kinase

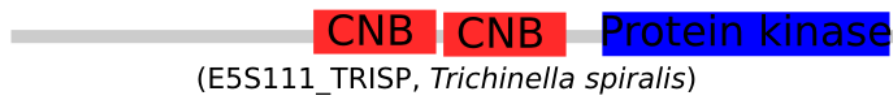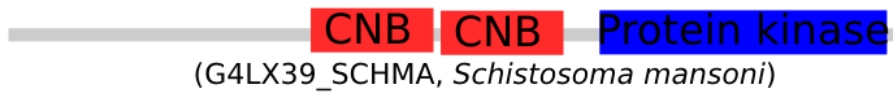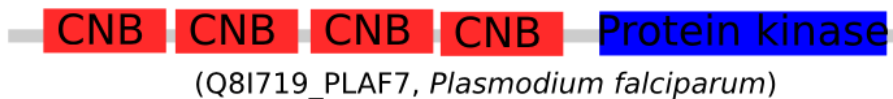

### cAMP dependent protein kinase regulatory chain

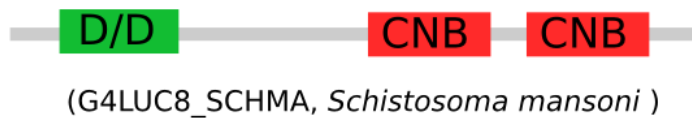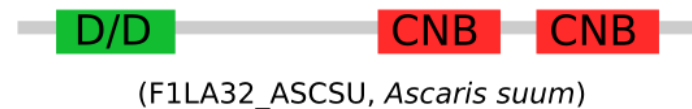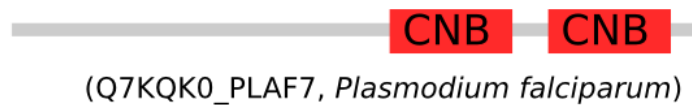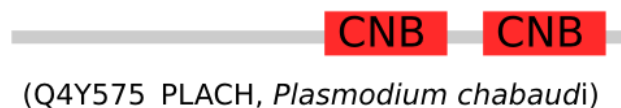

Supplementary Figure 1. Domain organization observed in pathogenic protein kinases and regulatory sub-domains with CNB domains. D/D: dimerization/docking domain of PKA-R.

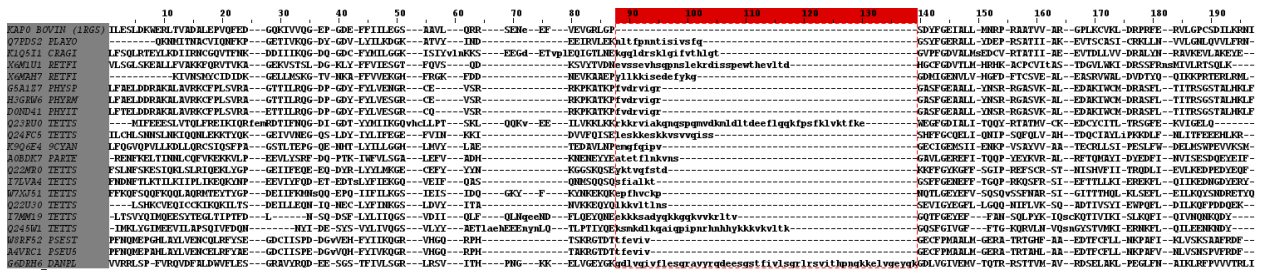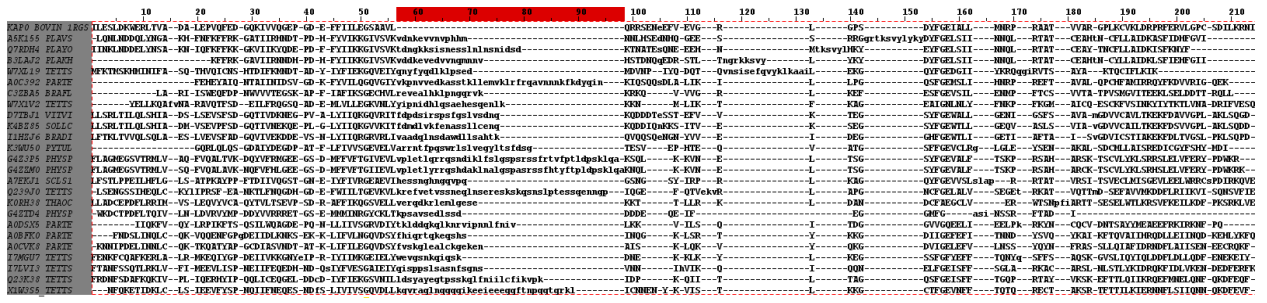

Supplementary Figure 2. Alignment of *Plasmodium* CNB domains with inserts. The insert regions are highlighted in red. The first sequence in the alignment is the reference sequence (1RGS 2<sup>nd</sup> domain).
